# Supplementary material
Source: publisher figshare collection journal article supplement (https://gsajournals.figshare.com/articles/dataset/_/11781954)

WINGS sorted branch length outputs from 81 case-control phenotypes in the UK Biobank (imputed data)

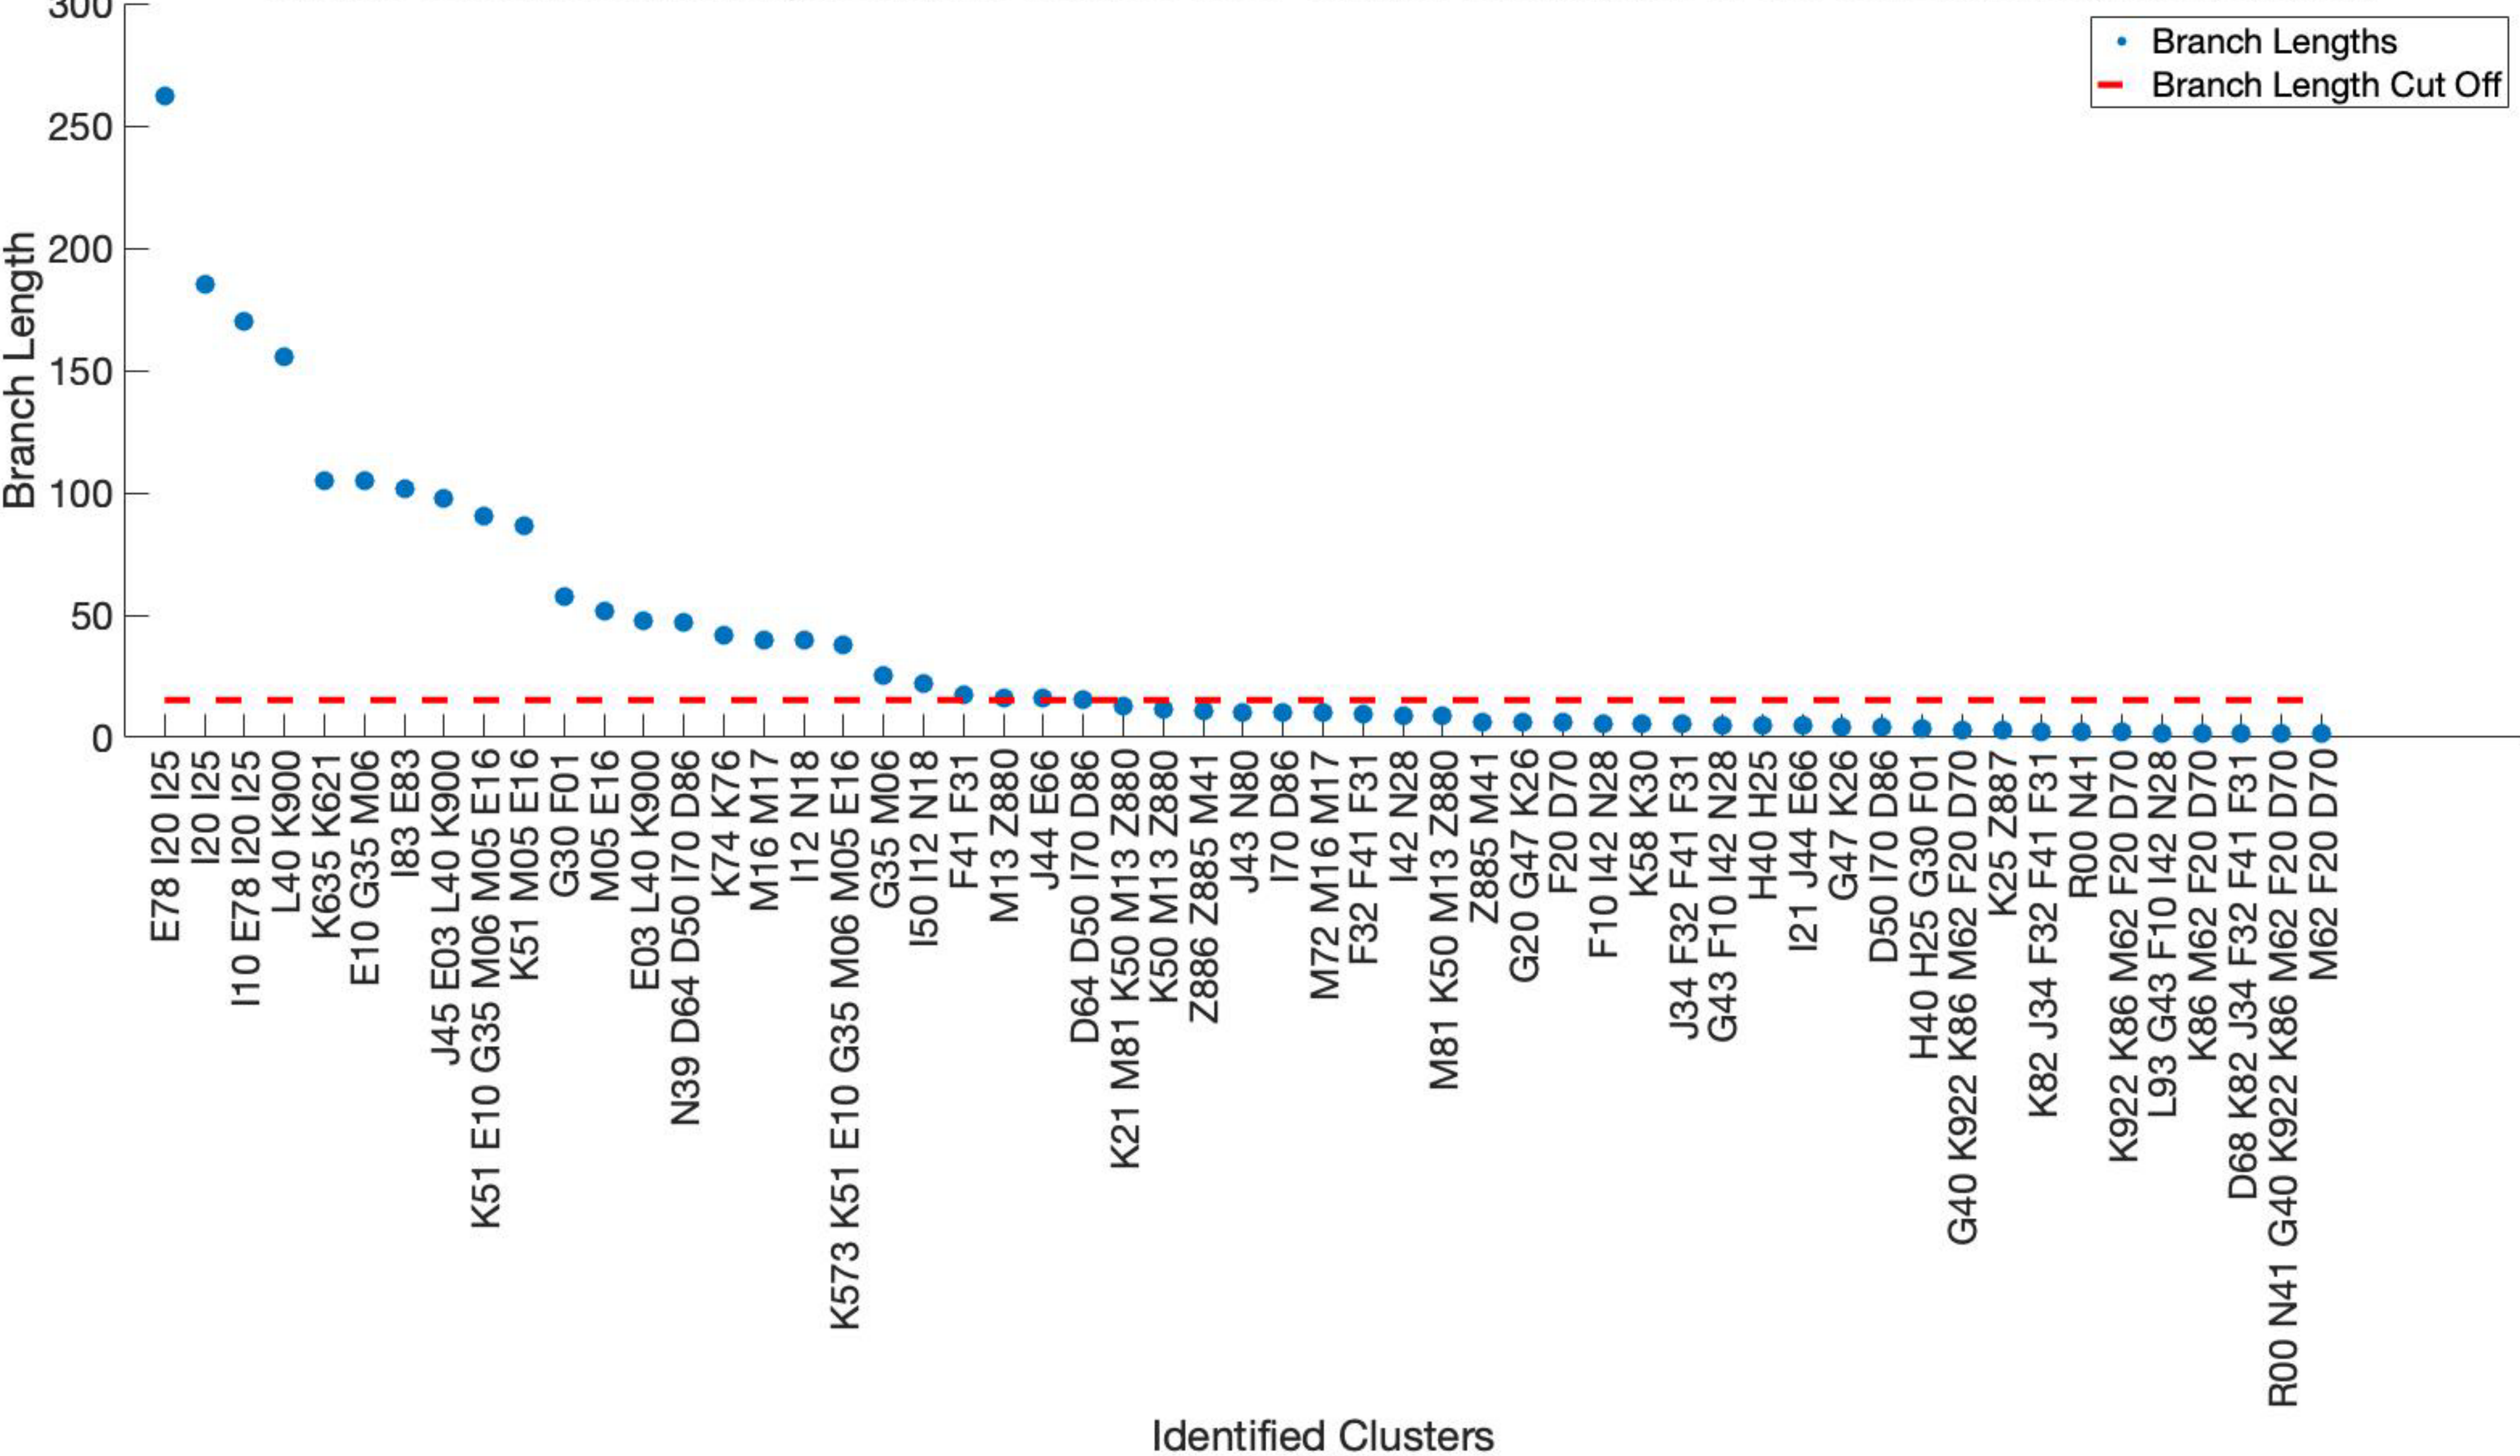

Supplement: Supplementary file 2 [file 1]
