# Supplementary material
Source: publisher figshare collection journal article supplement (https://gsajournals.figshare.com/articles/dataset/_/11781954)

WINGS sorted branch length outputs from 81 case-control phenotypes in the UK Biobanks (with haplotypes)

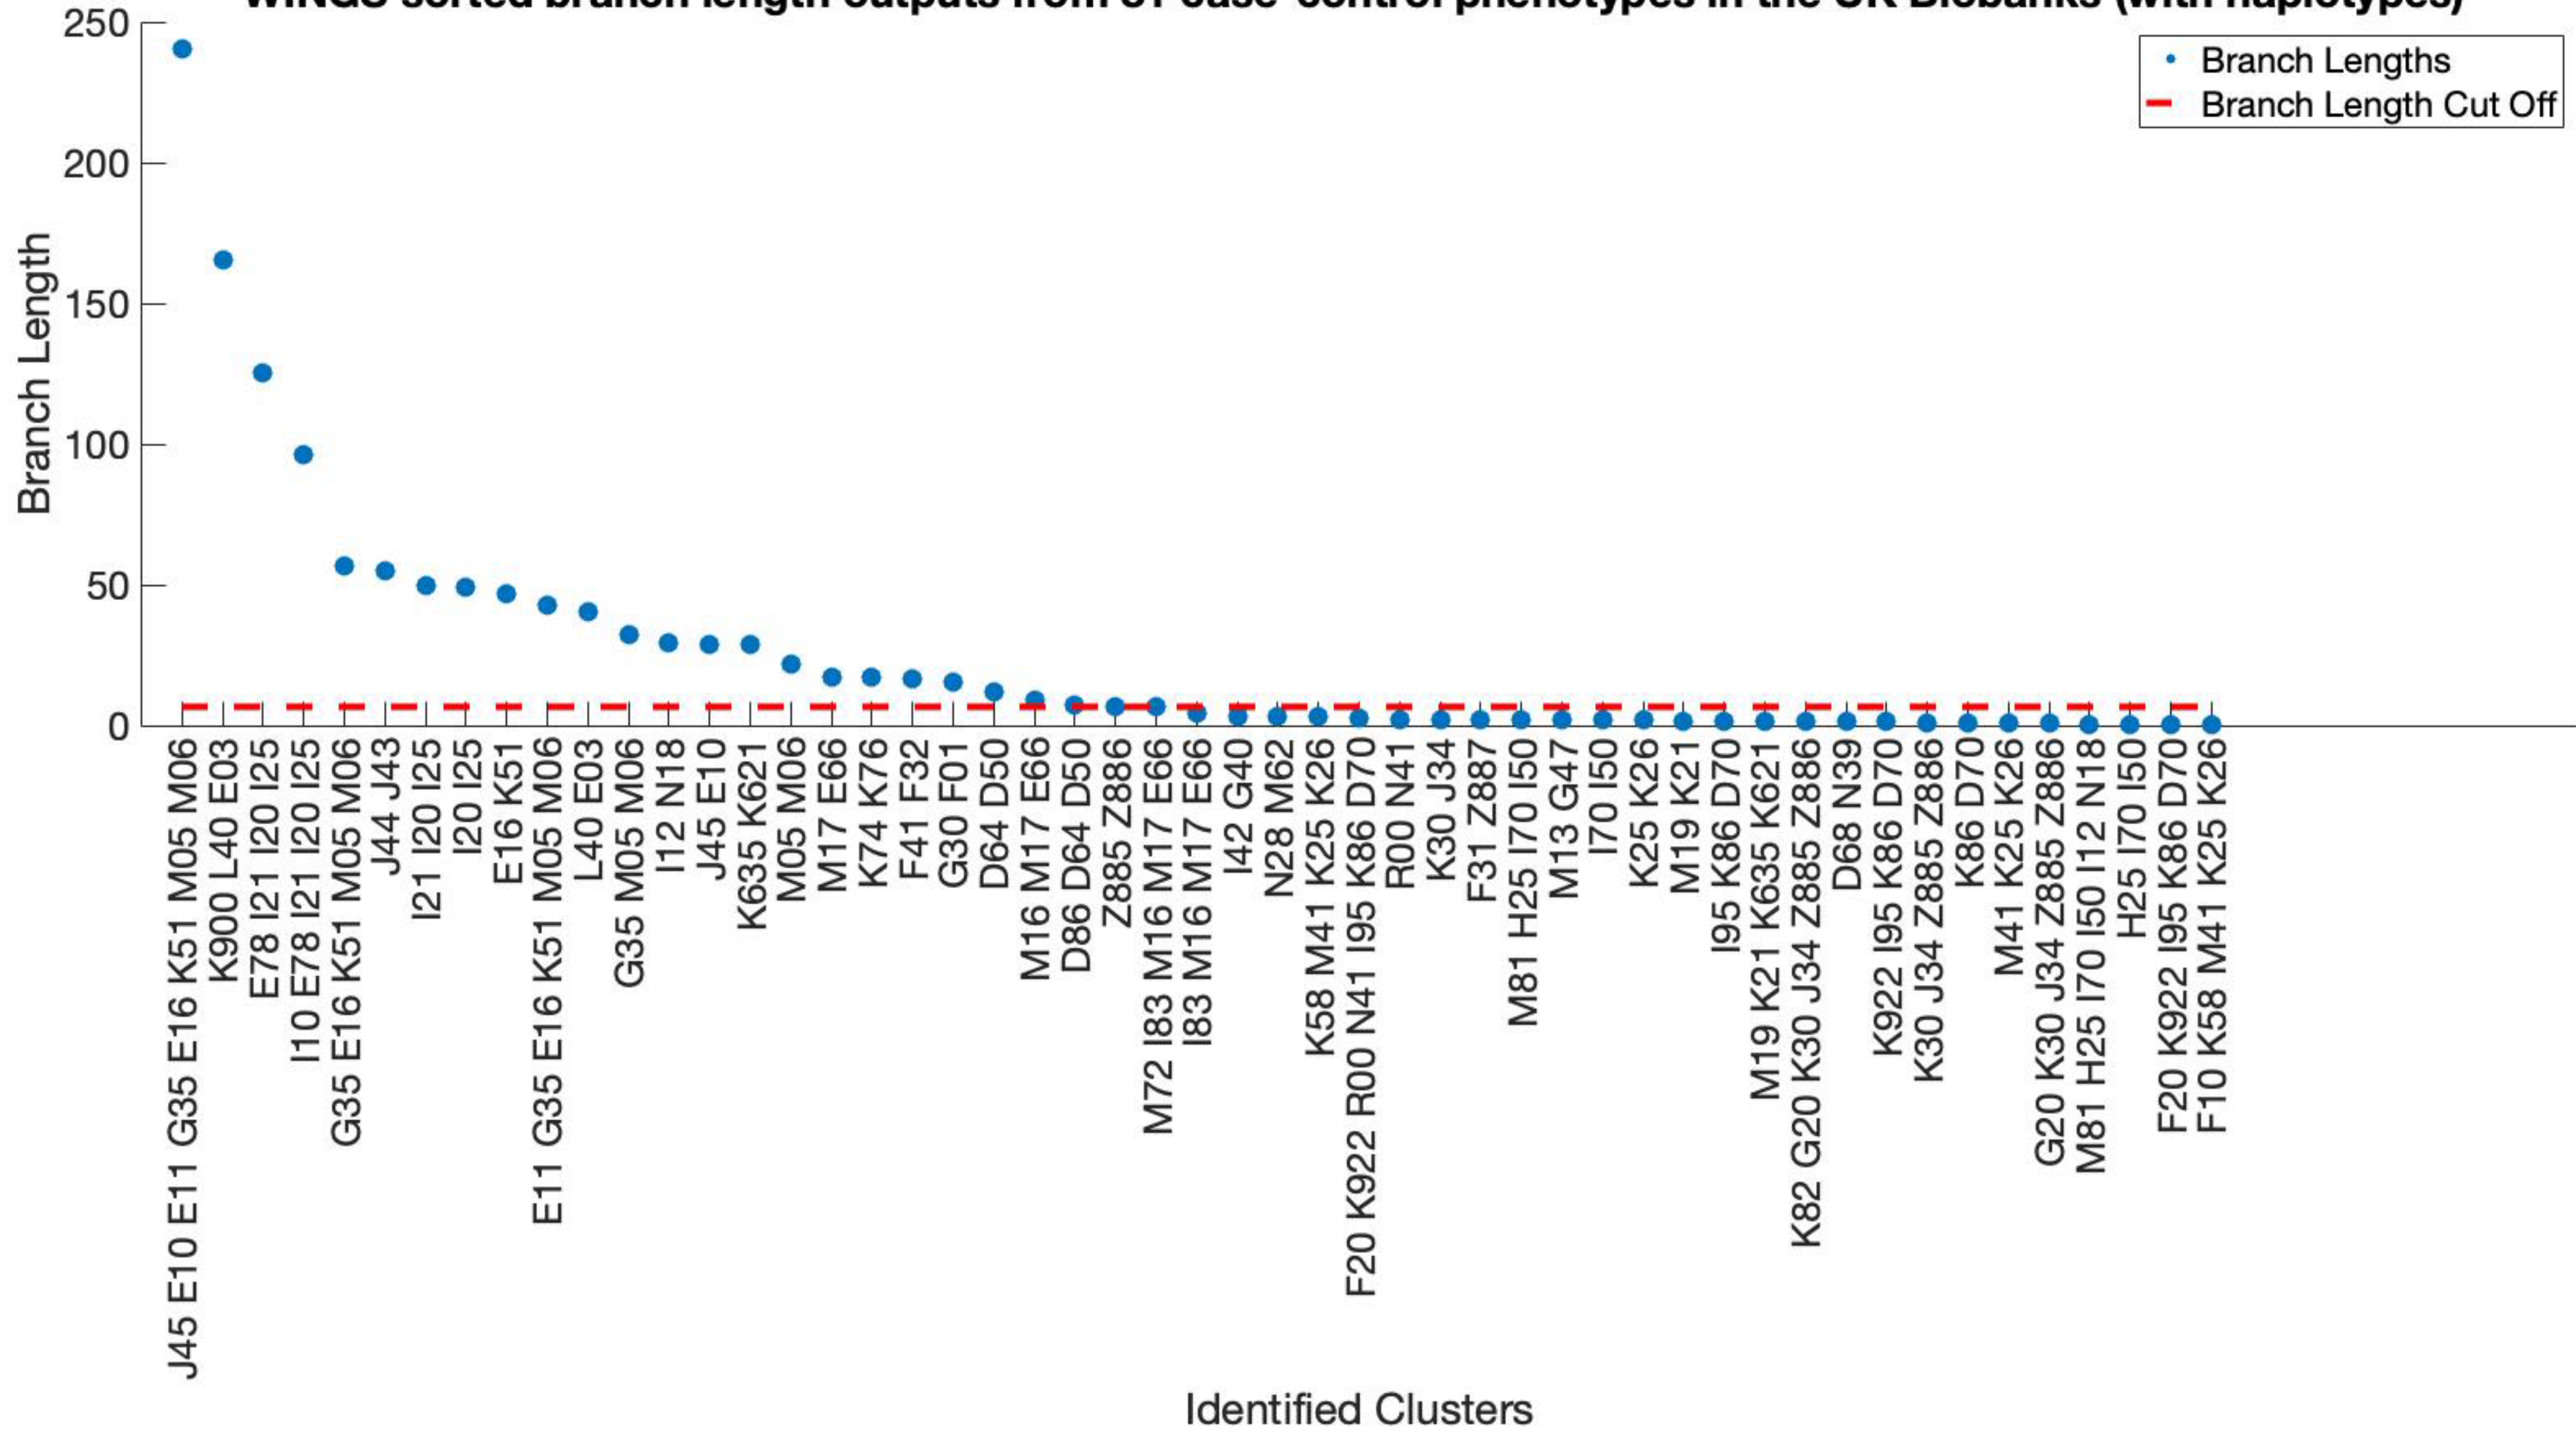

Supplement: Supplementary file 9 [file 1]
