# Supplementary material
Source: publisher figshare collection journal article supplement (https://gsajournals.figshare.com/articles/dataset/_/11781954)

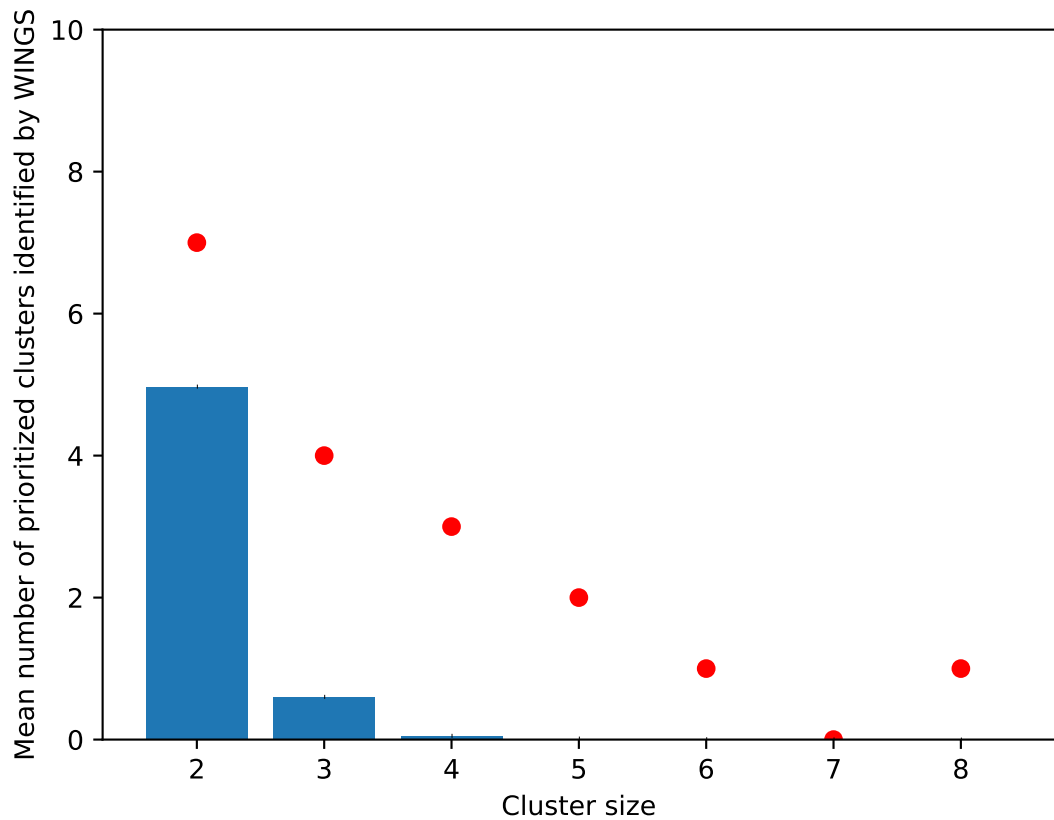

Supplement: Supplementary file 1 [file 1]

WINGS sorted branch lengths from 81 case-control phenotypes in the UK Biobank (no buffer)

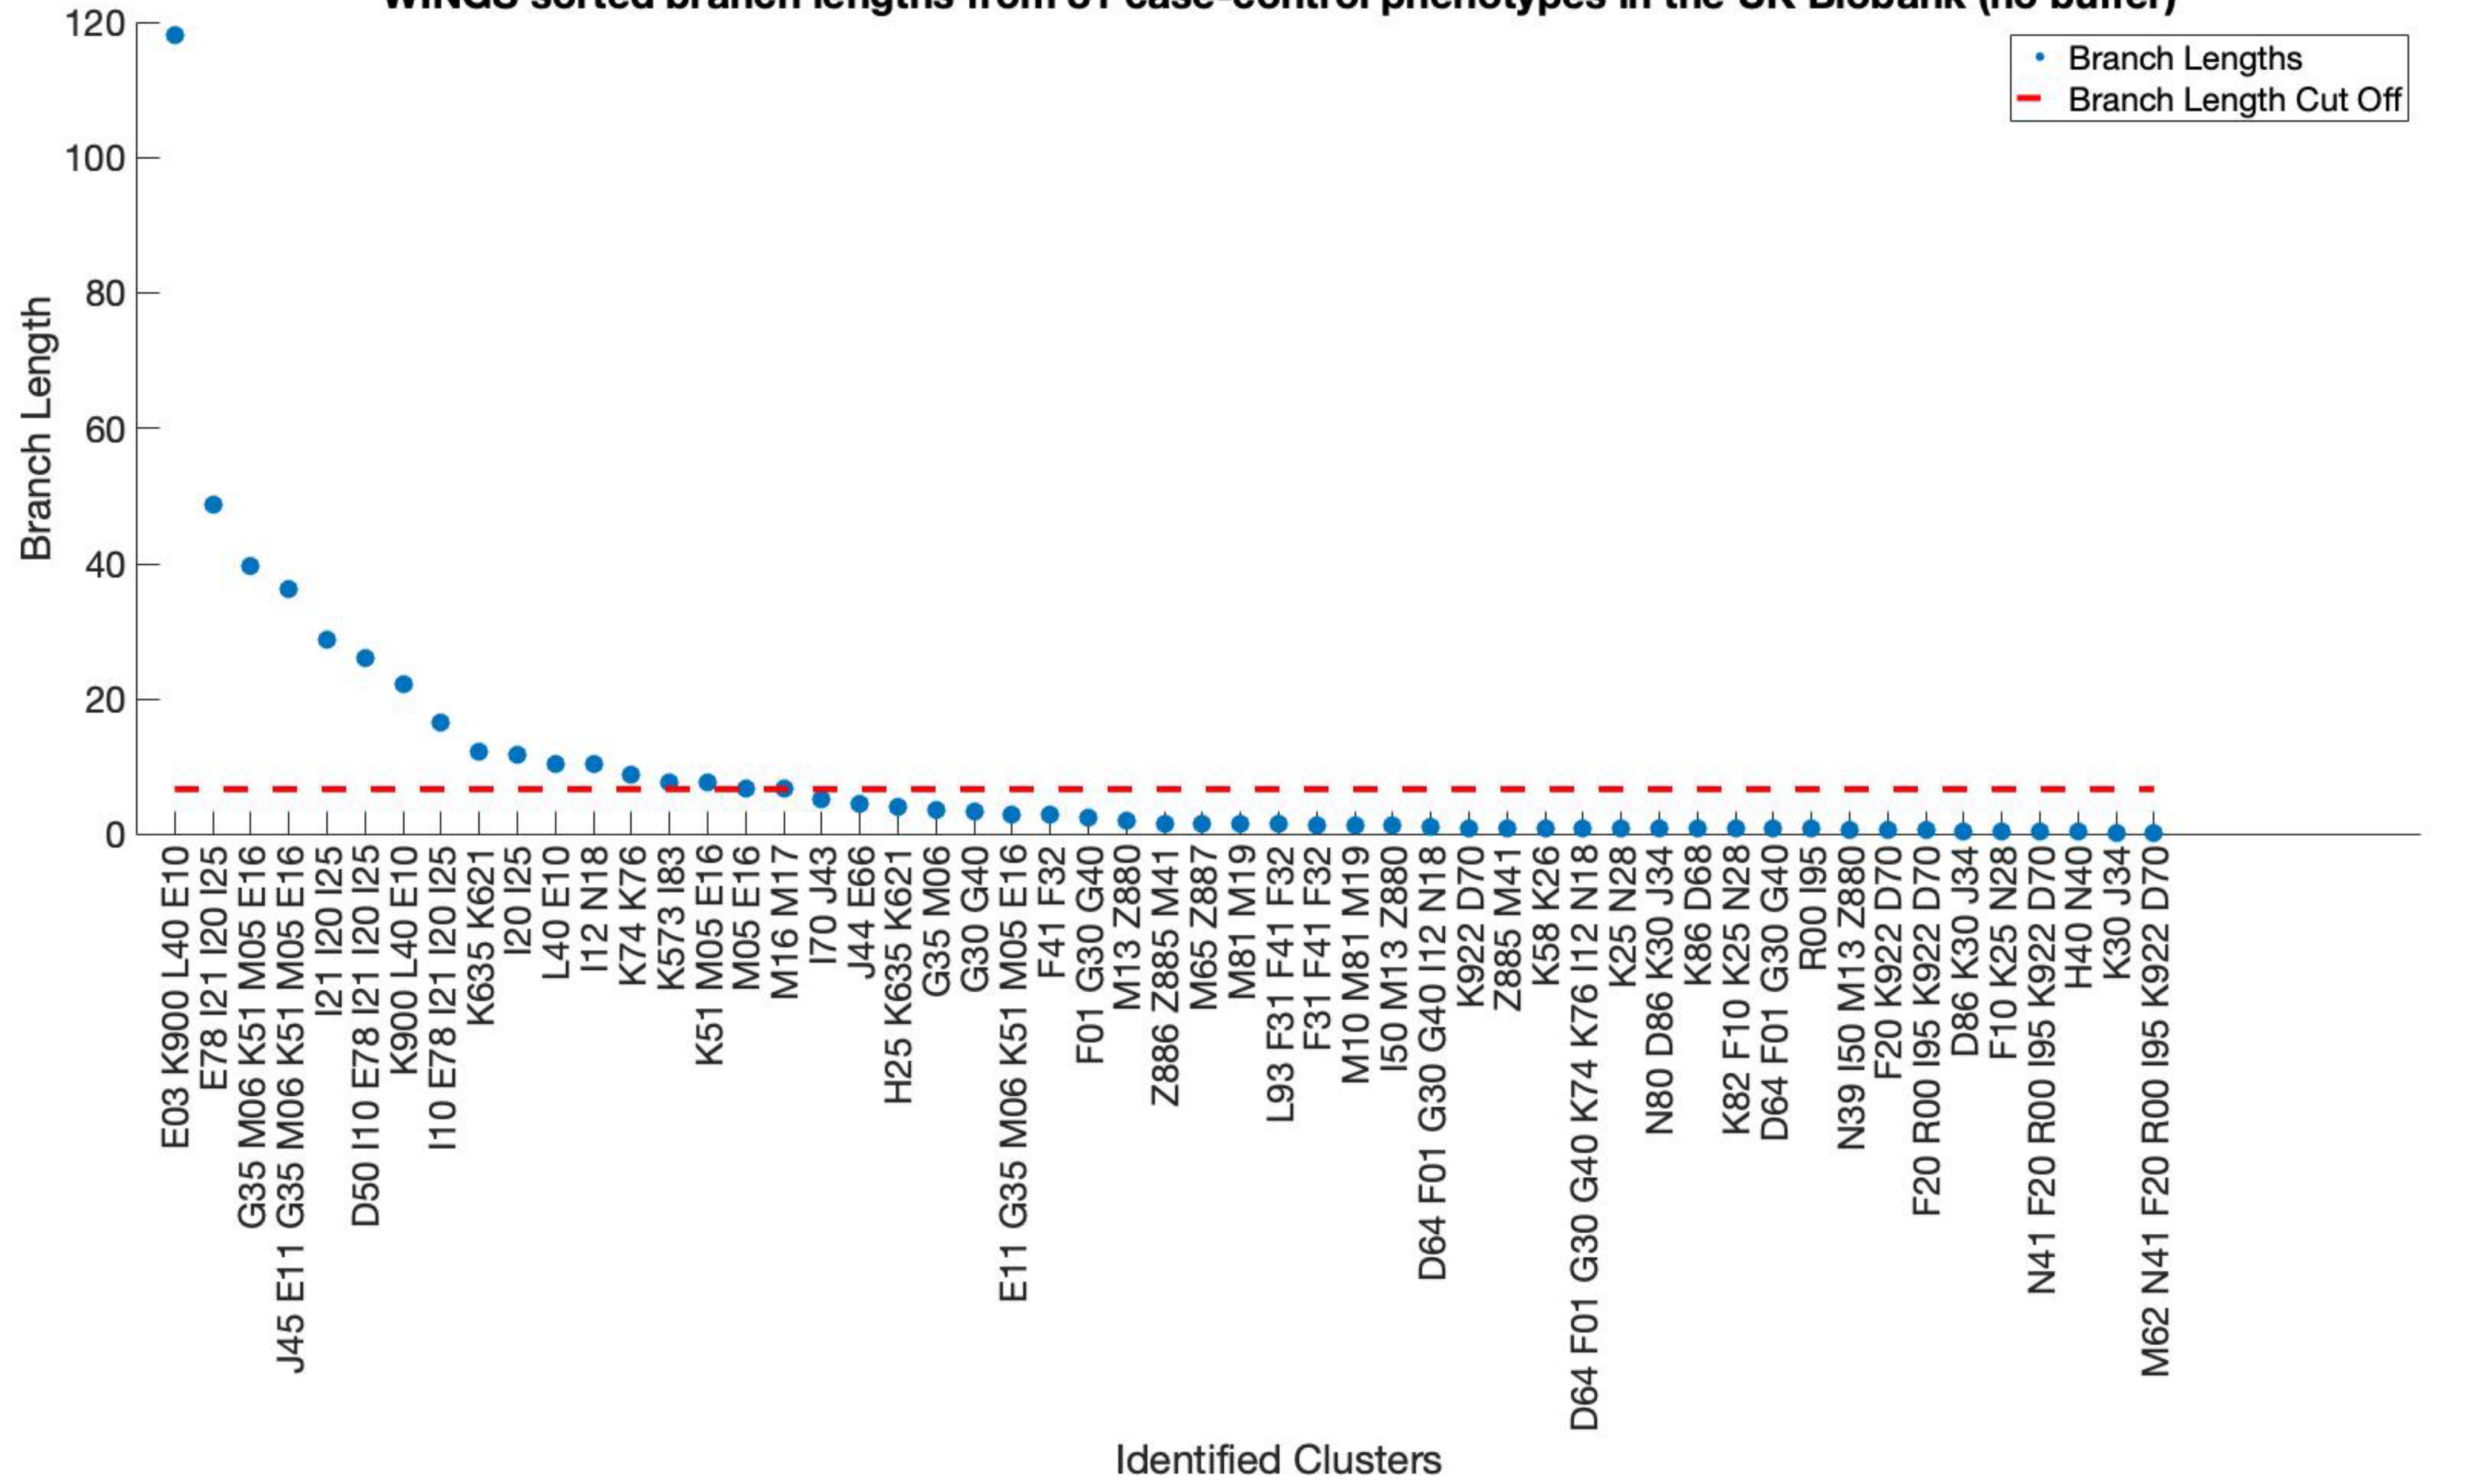

Supplement: Supplementary file 3 [file 1]

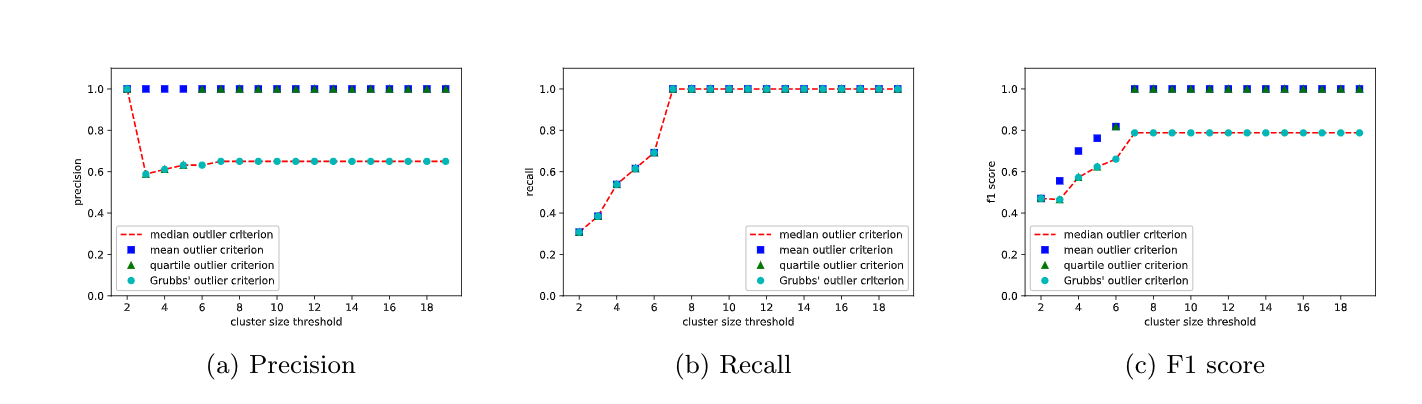

Supplement: Supplementary file 4 [file 1]

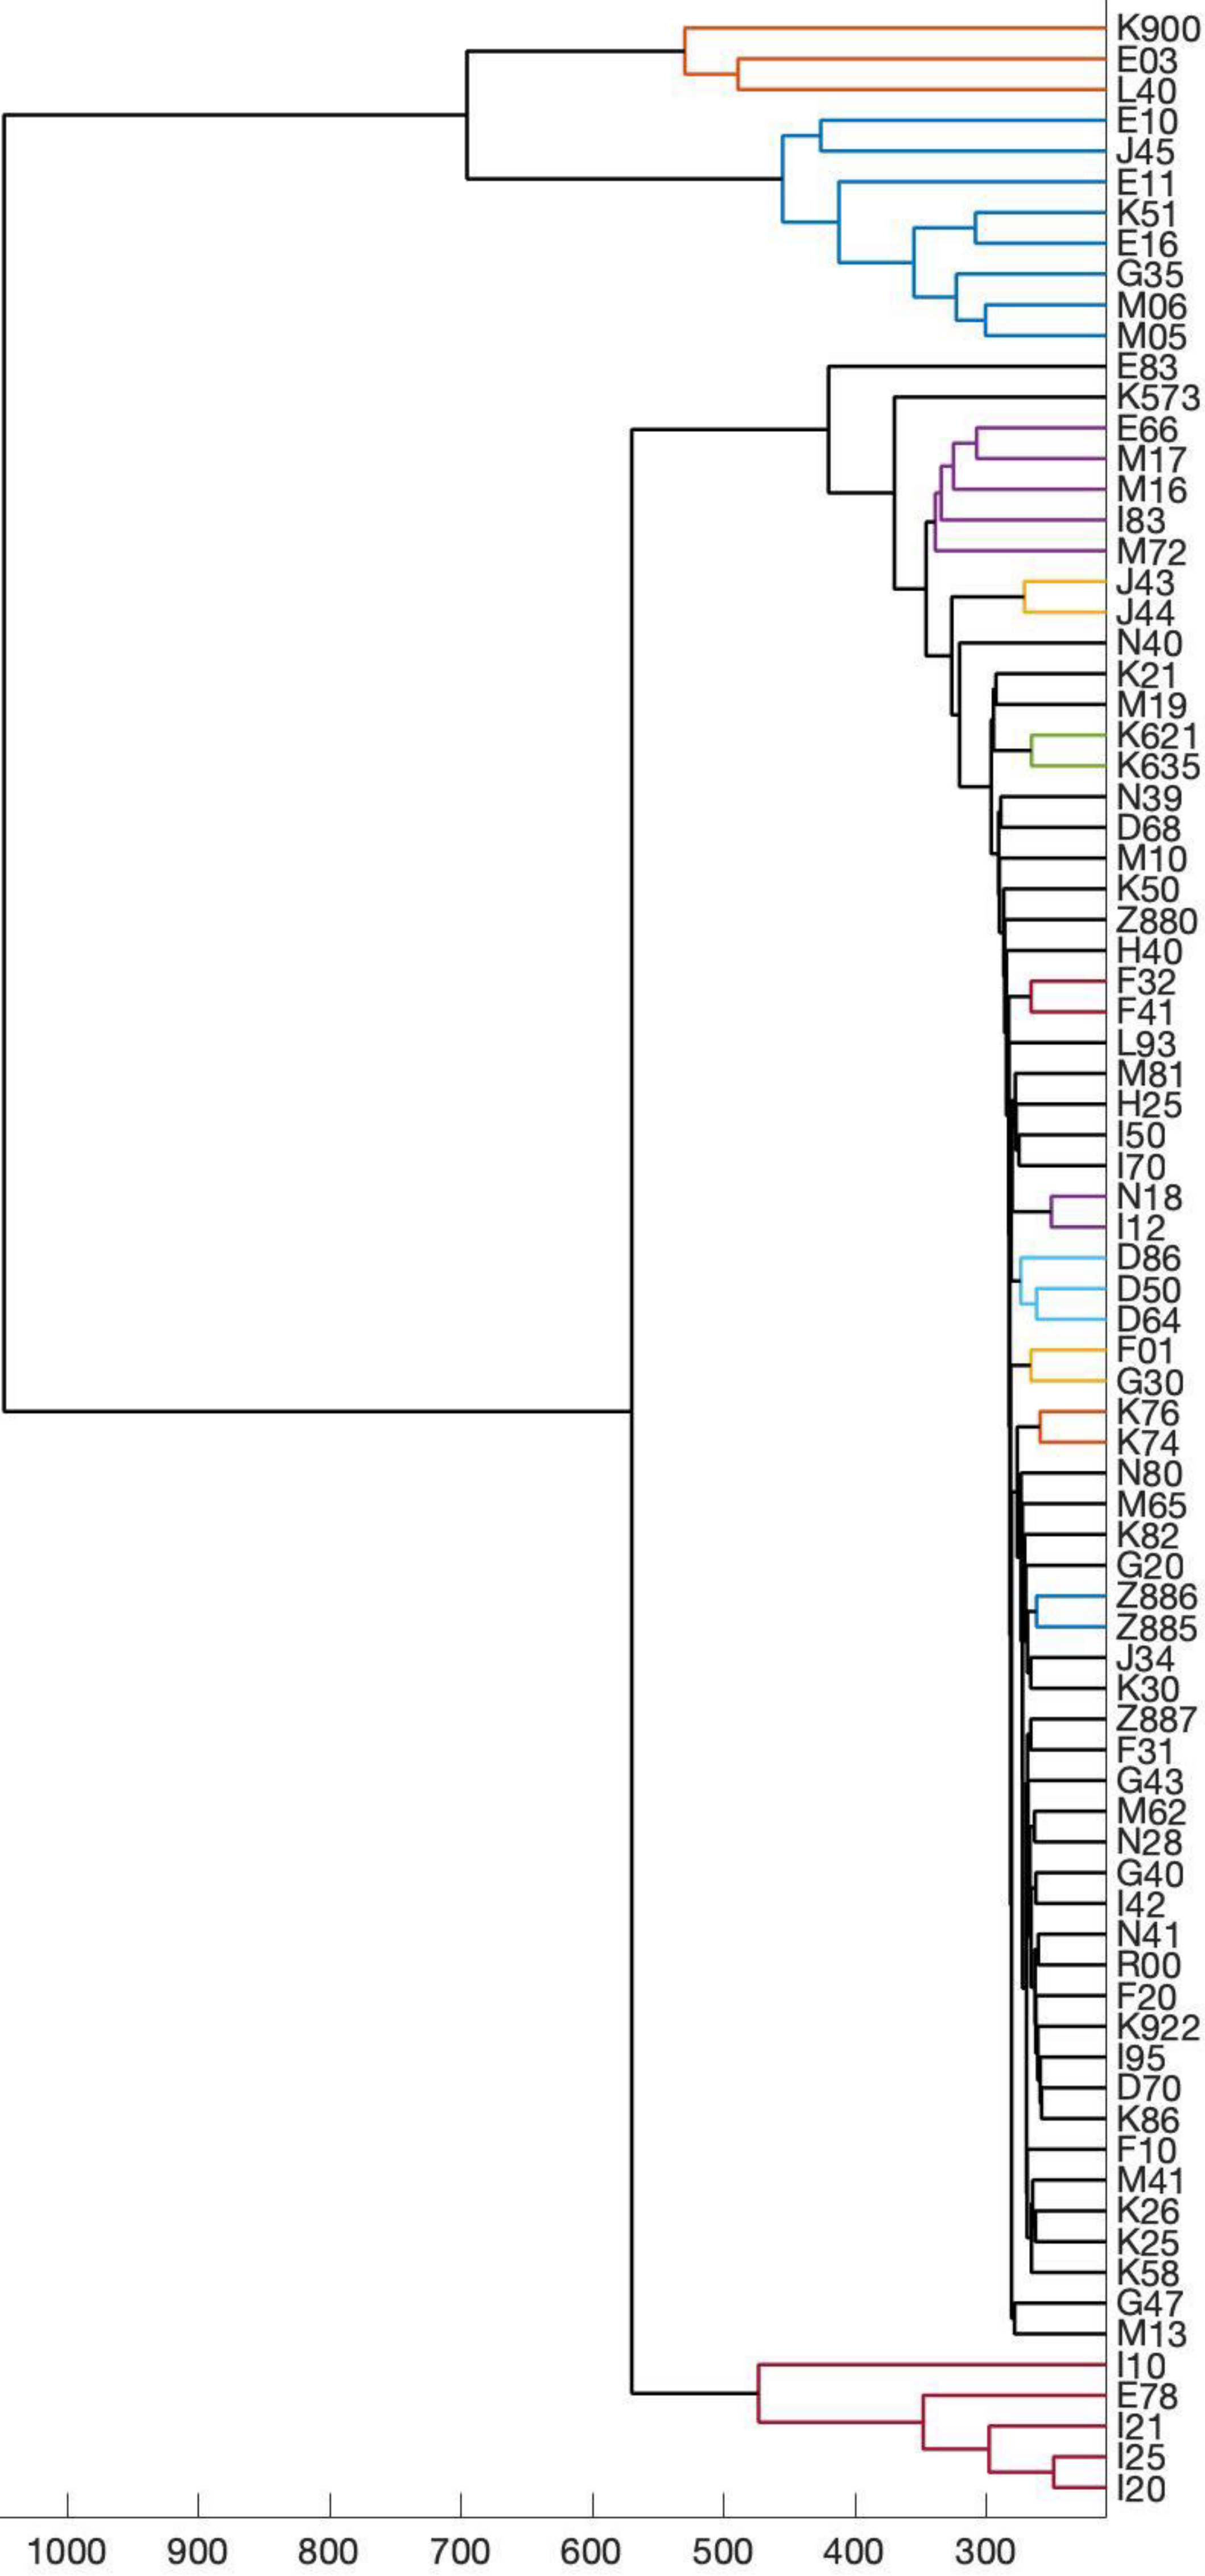

Supplement: Supplementary file 5 [file 1]

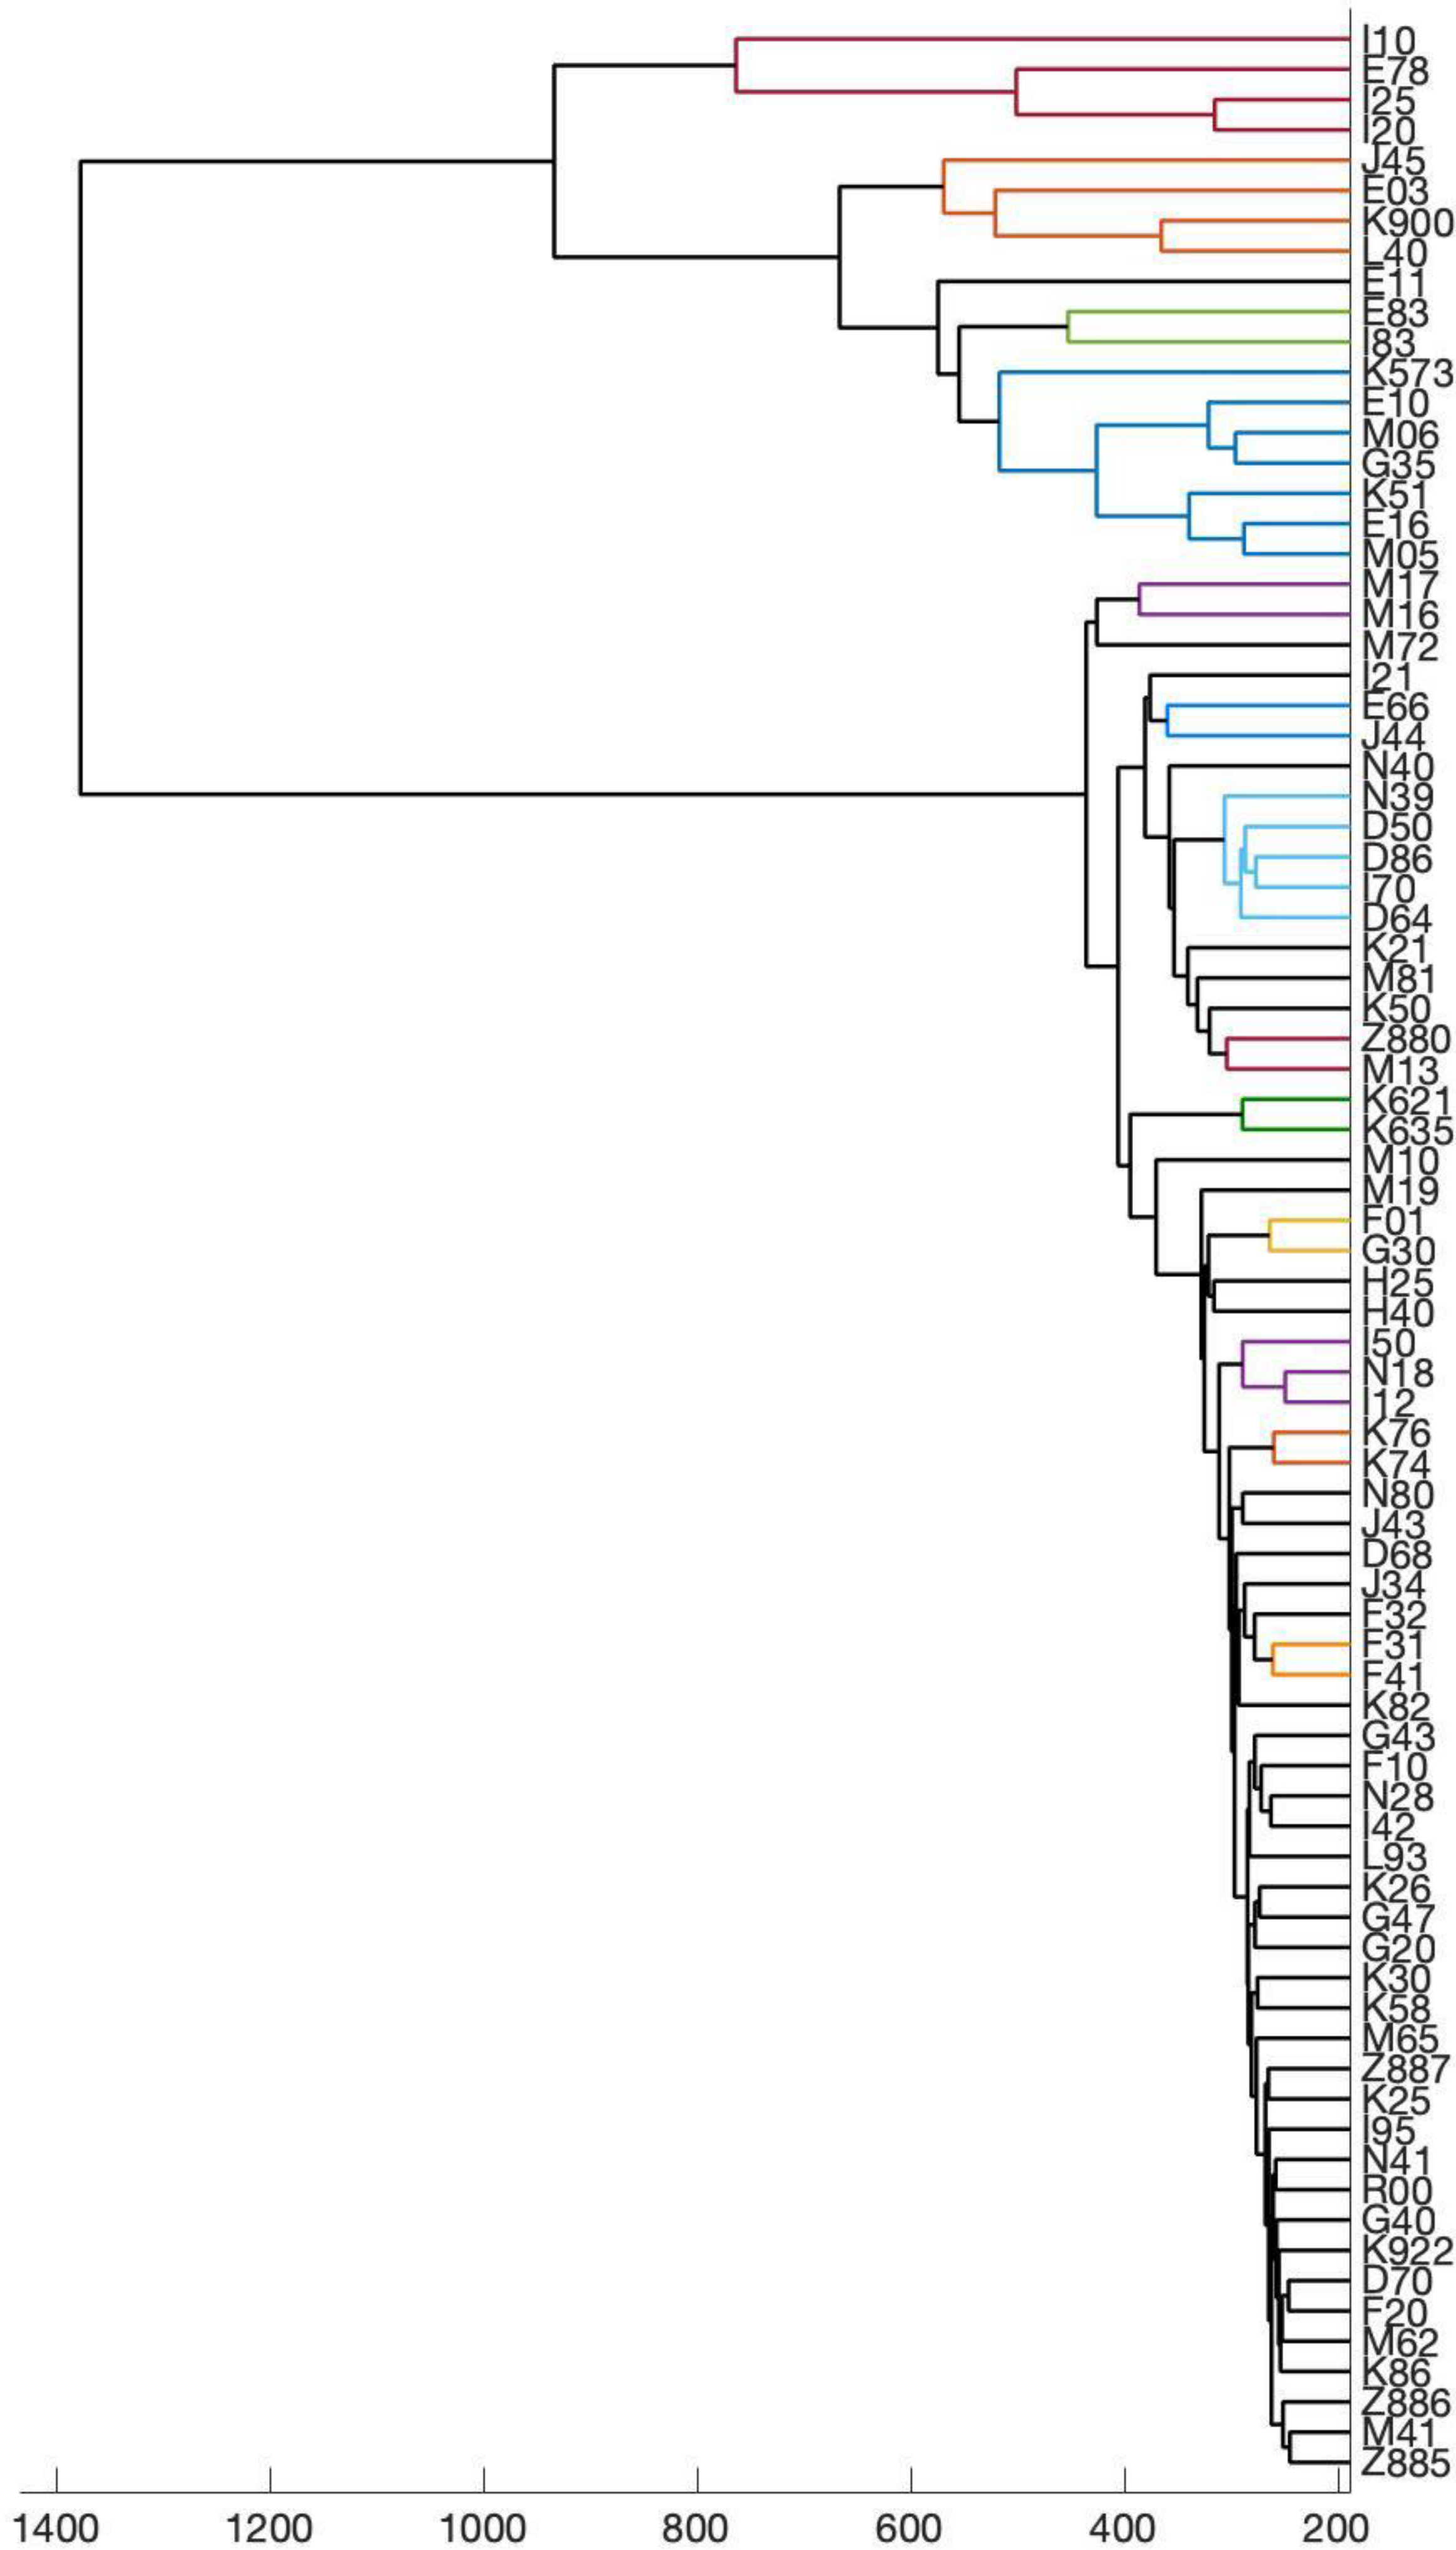

Supplement: Supplementary file 6 [file 1]

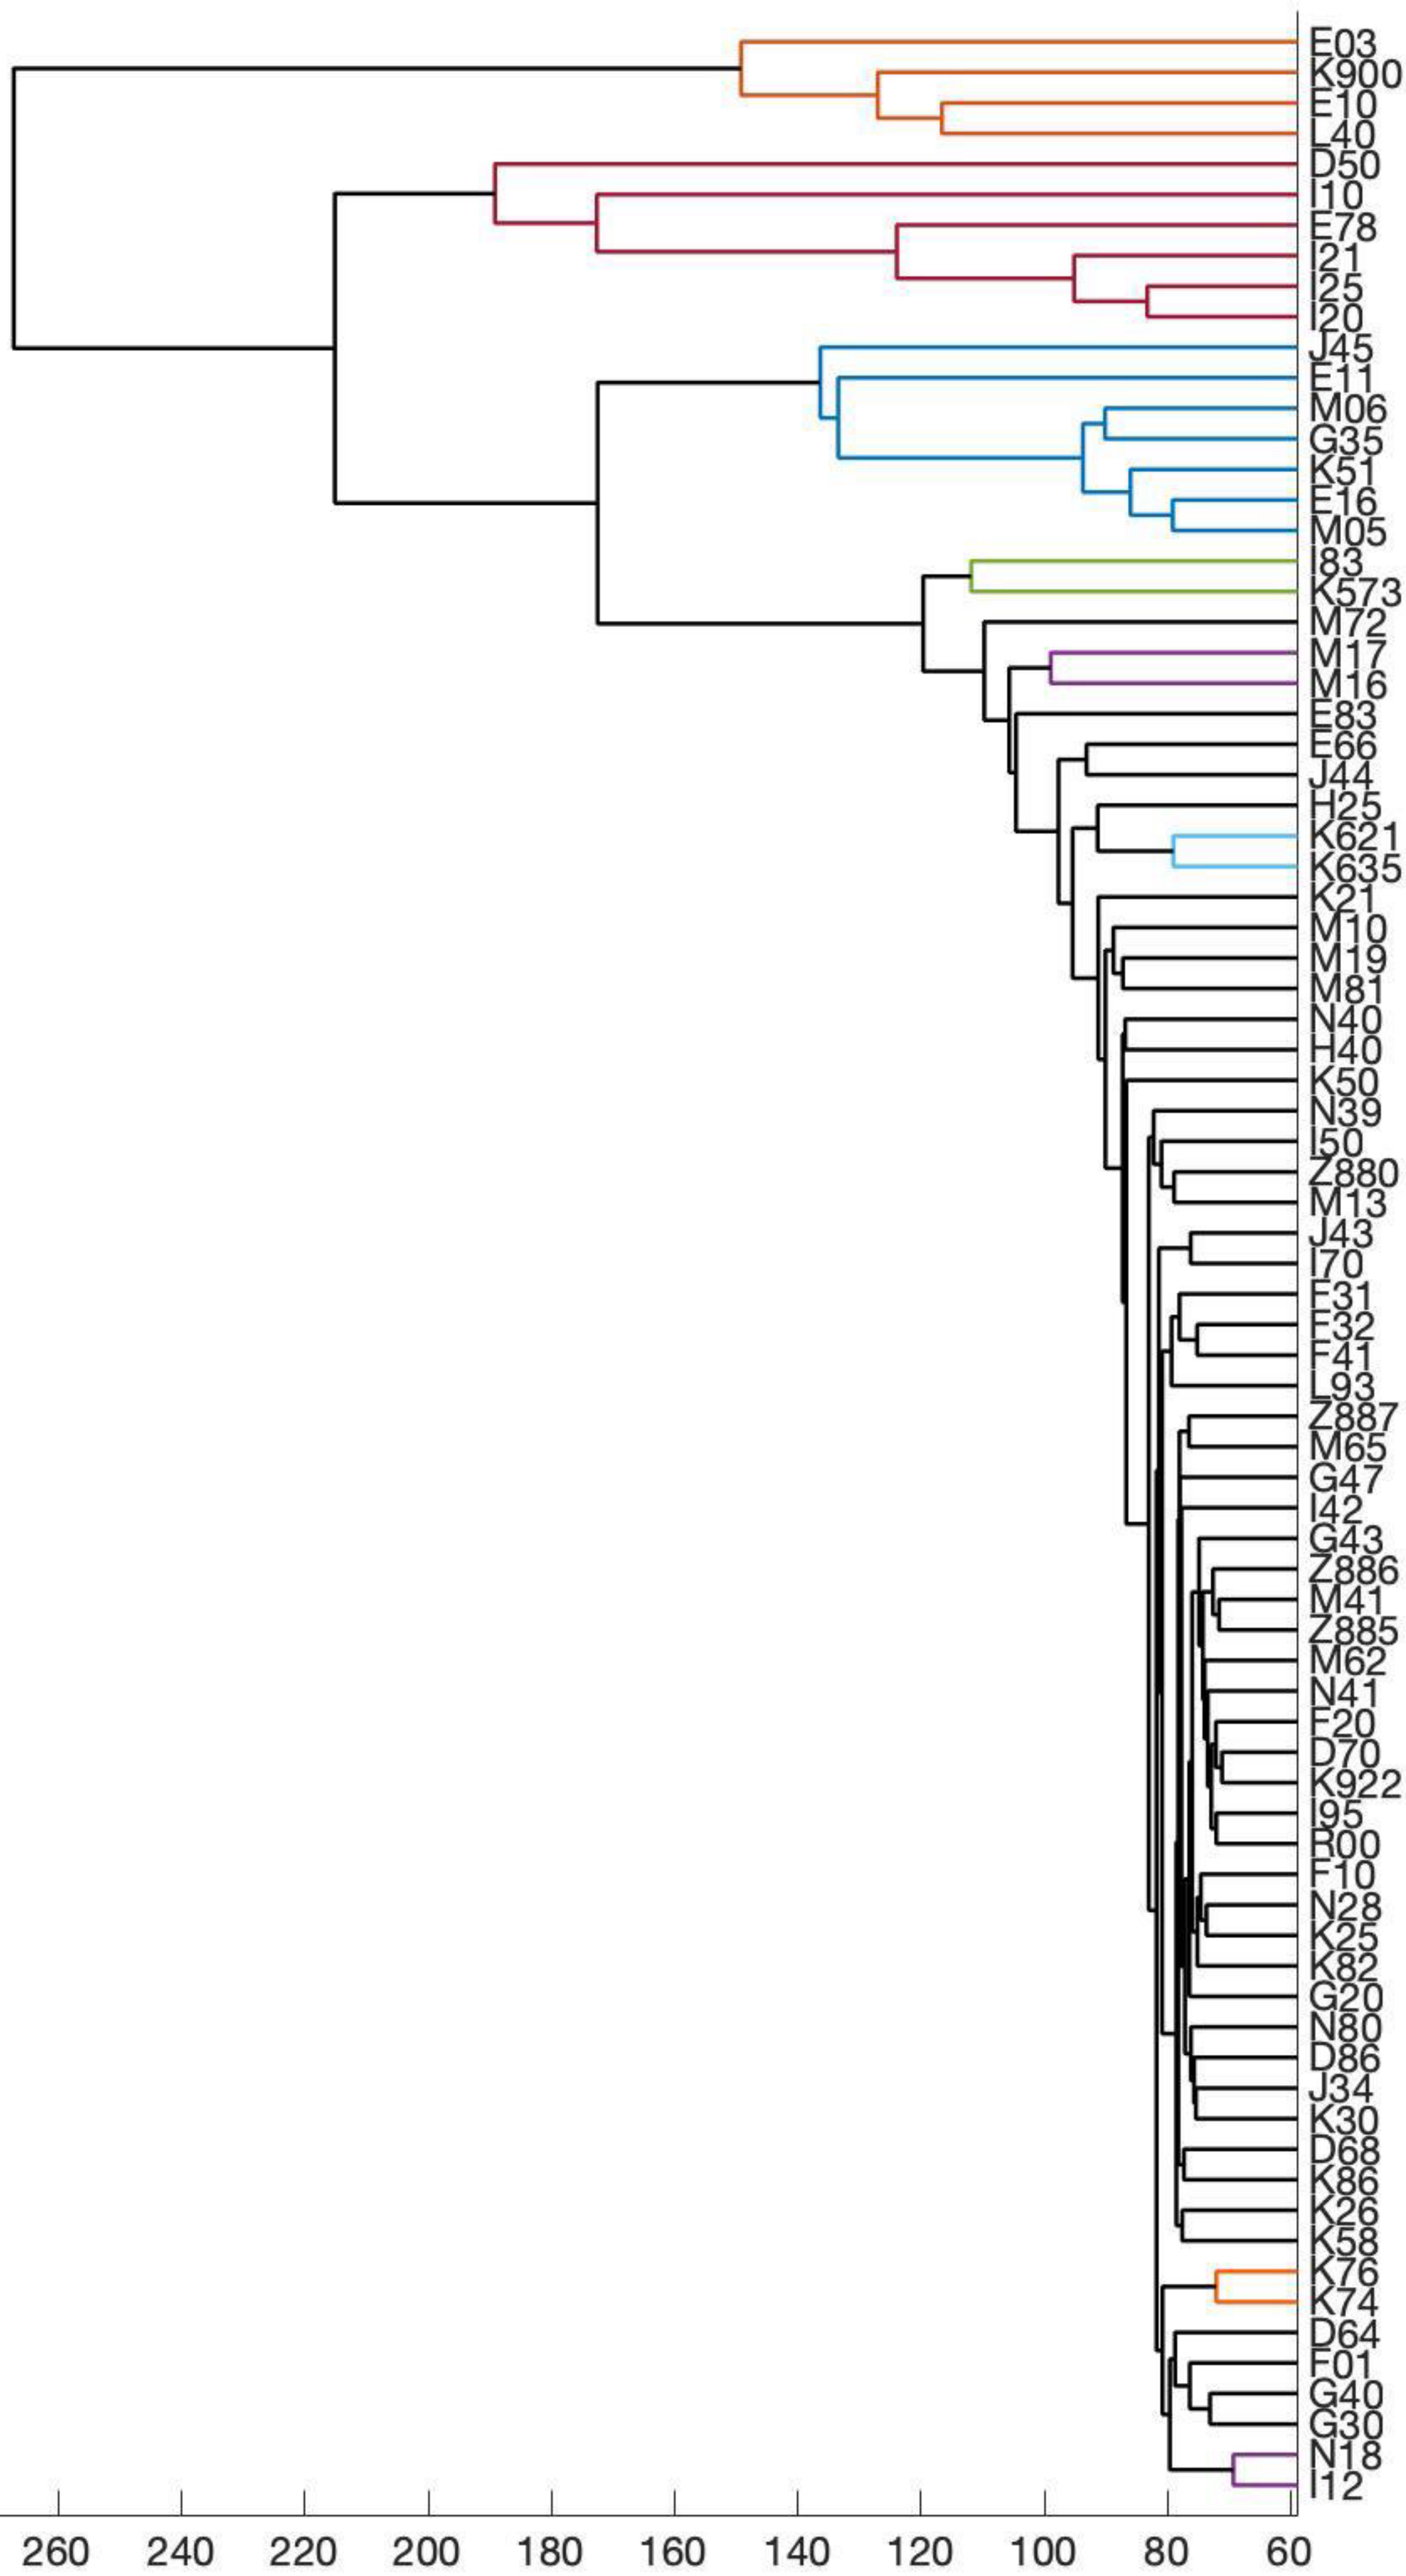

Supplement: Supplementary file 7 [file 1]

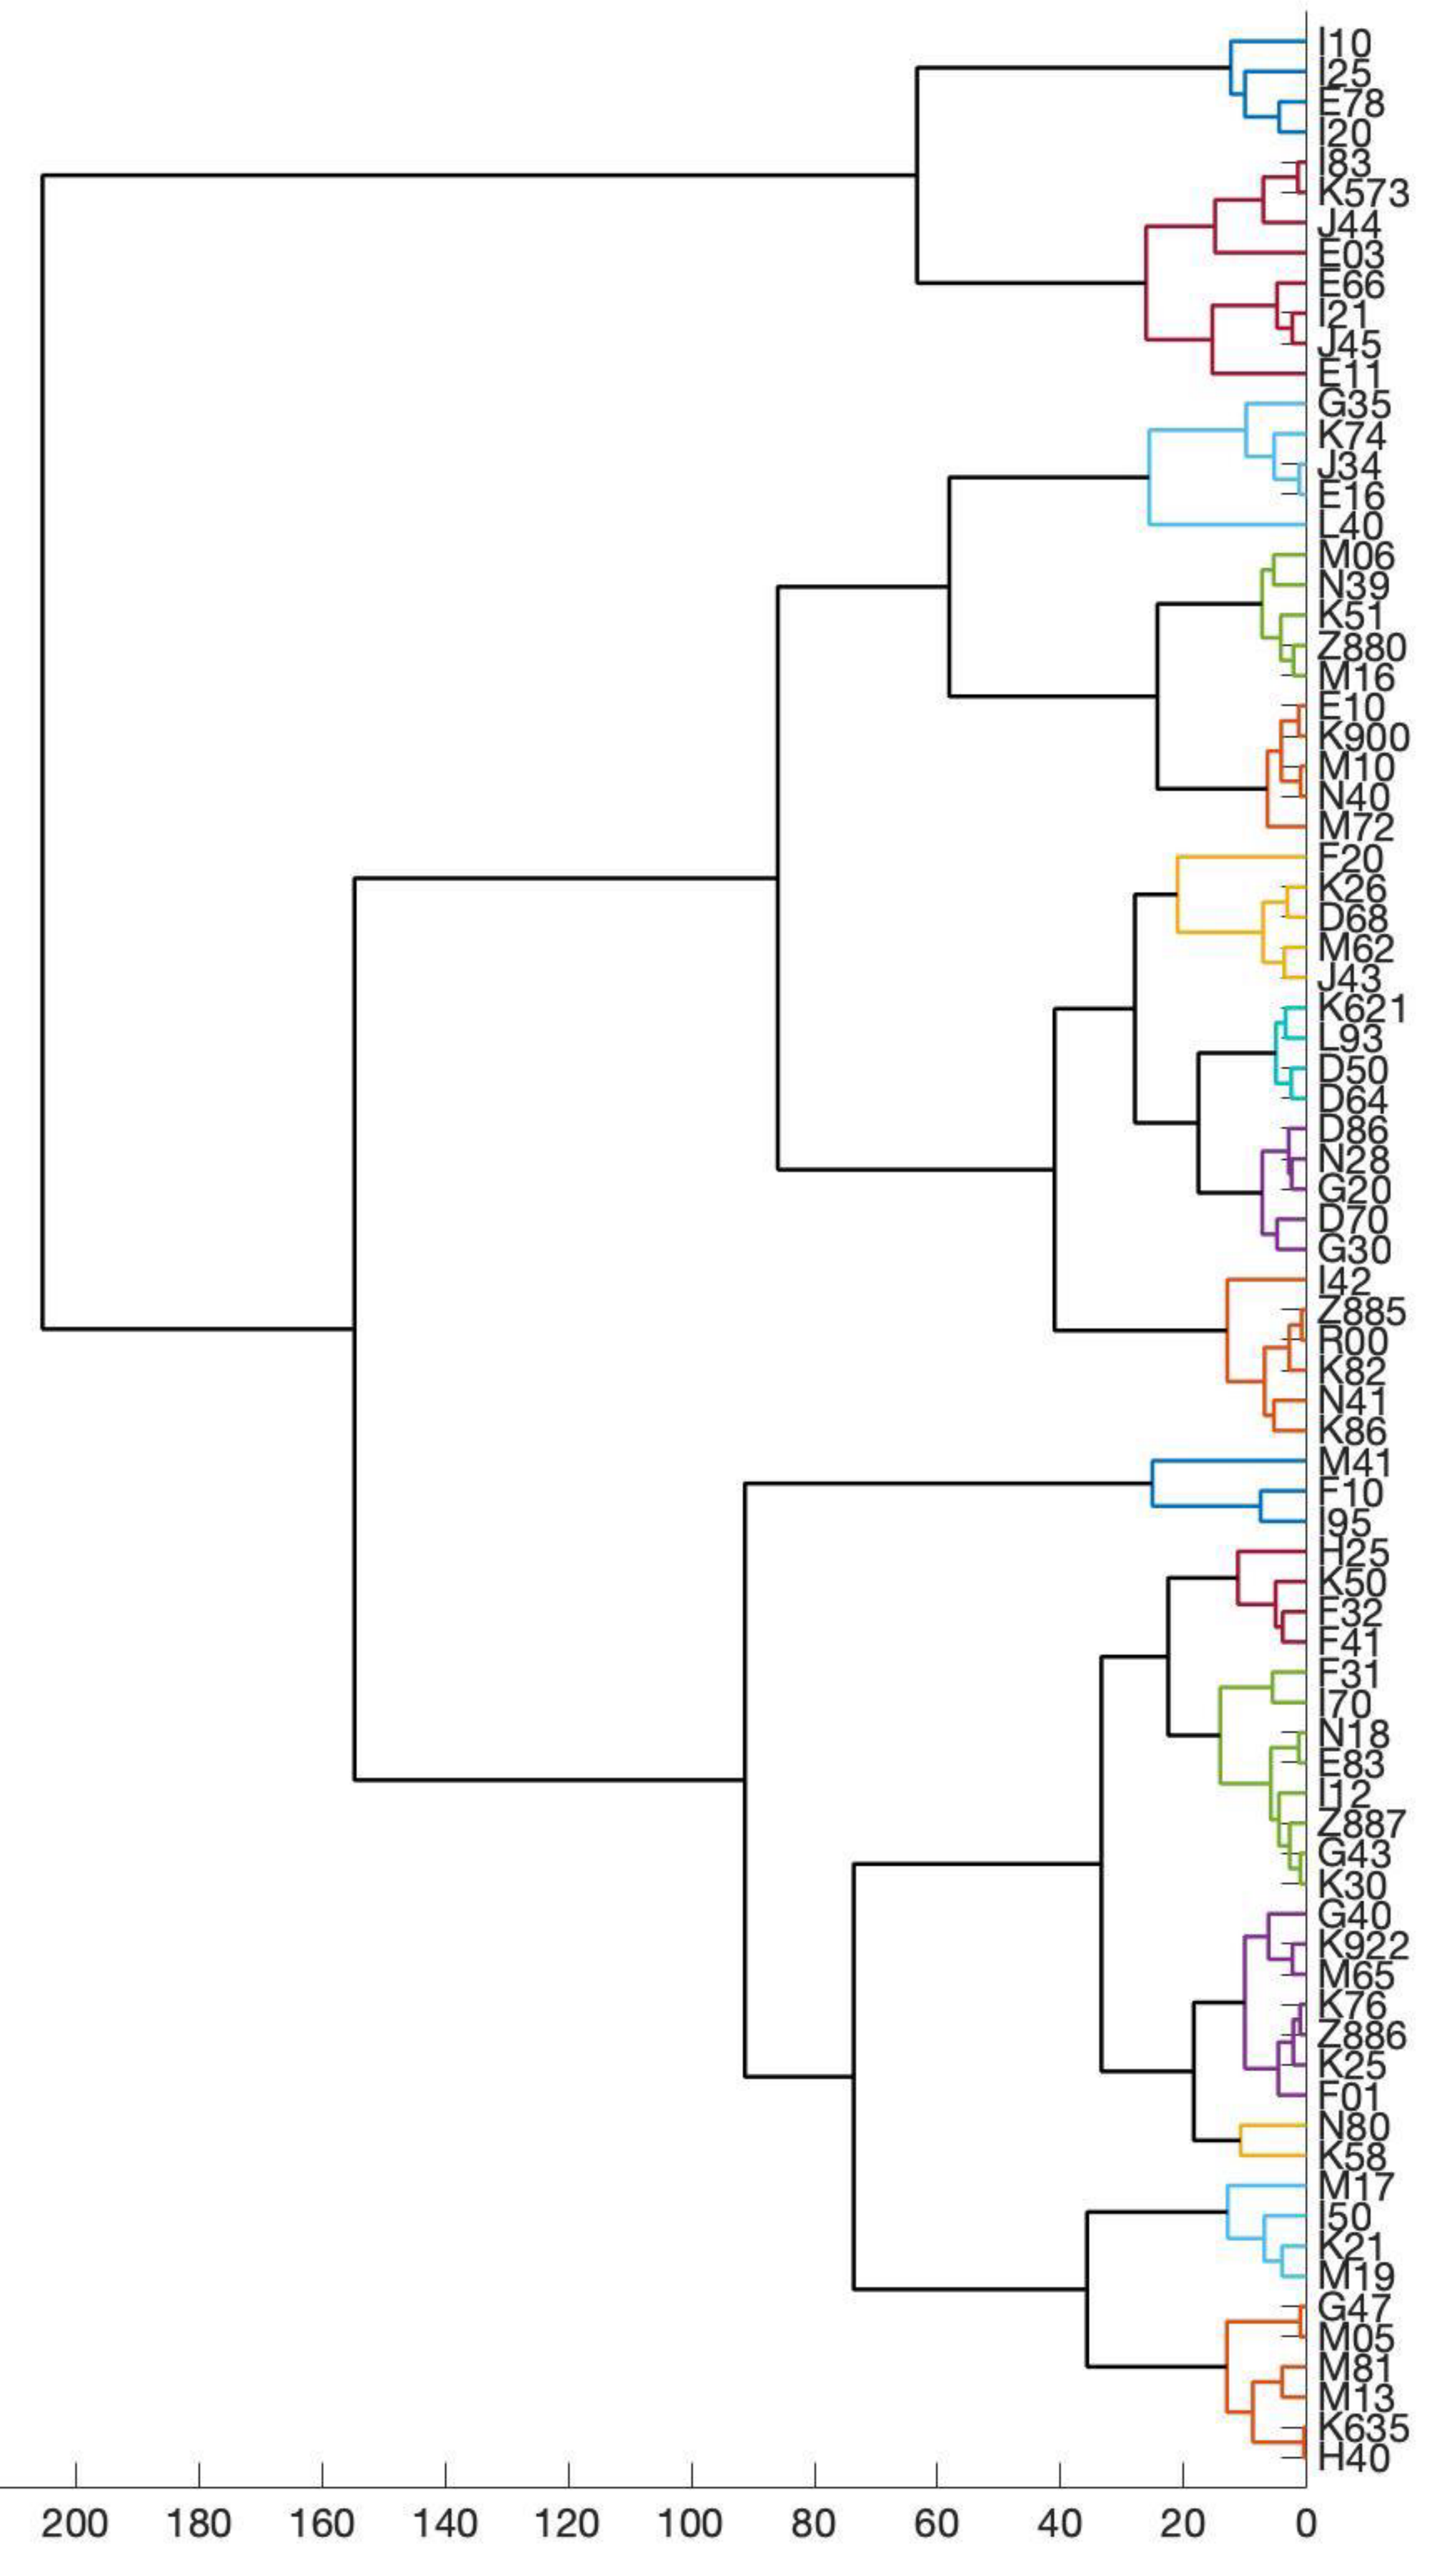

Supplement: Supplementary file 8 [file 1]

WINGS sorted branch lenght outputs from 81 case-control phenotypes in the UK Biobank

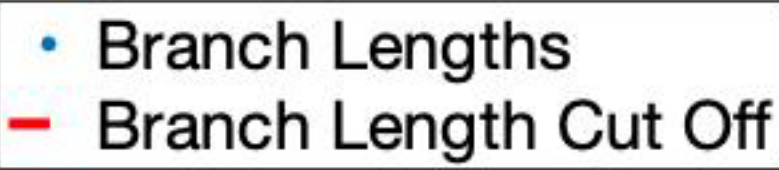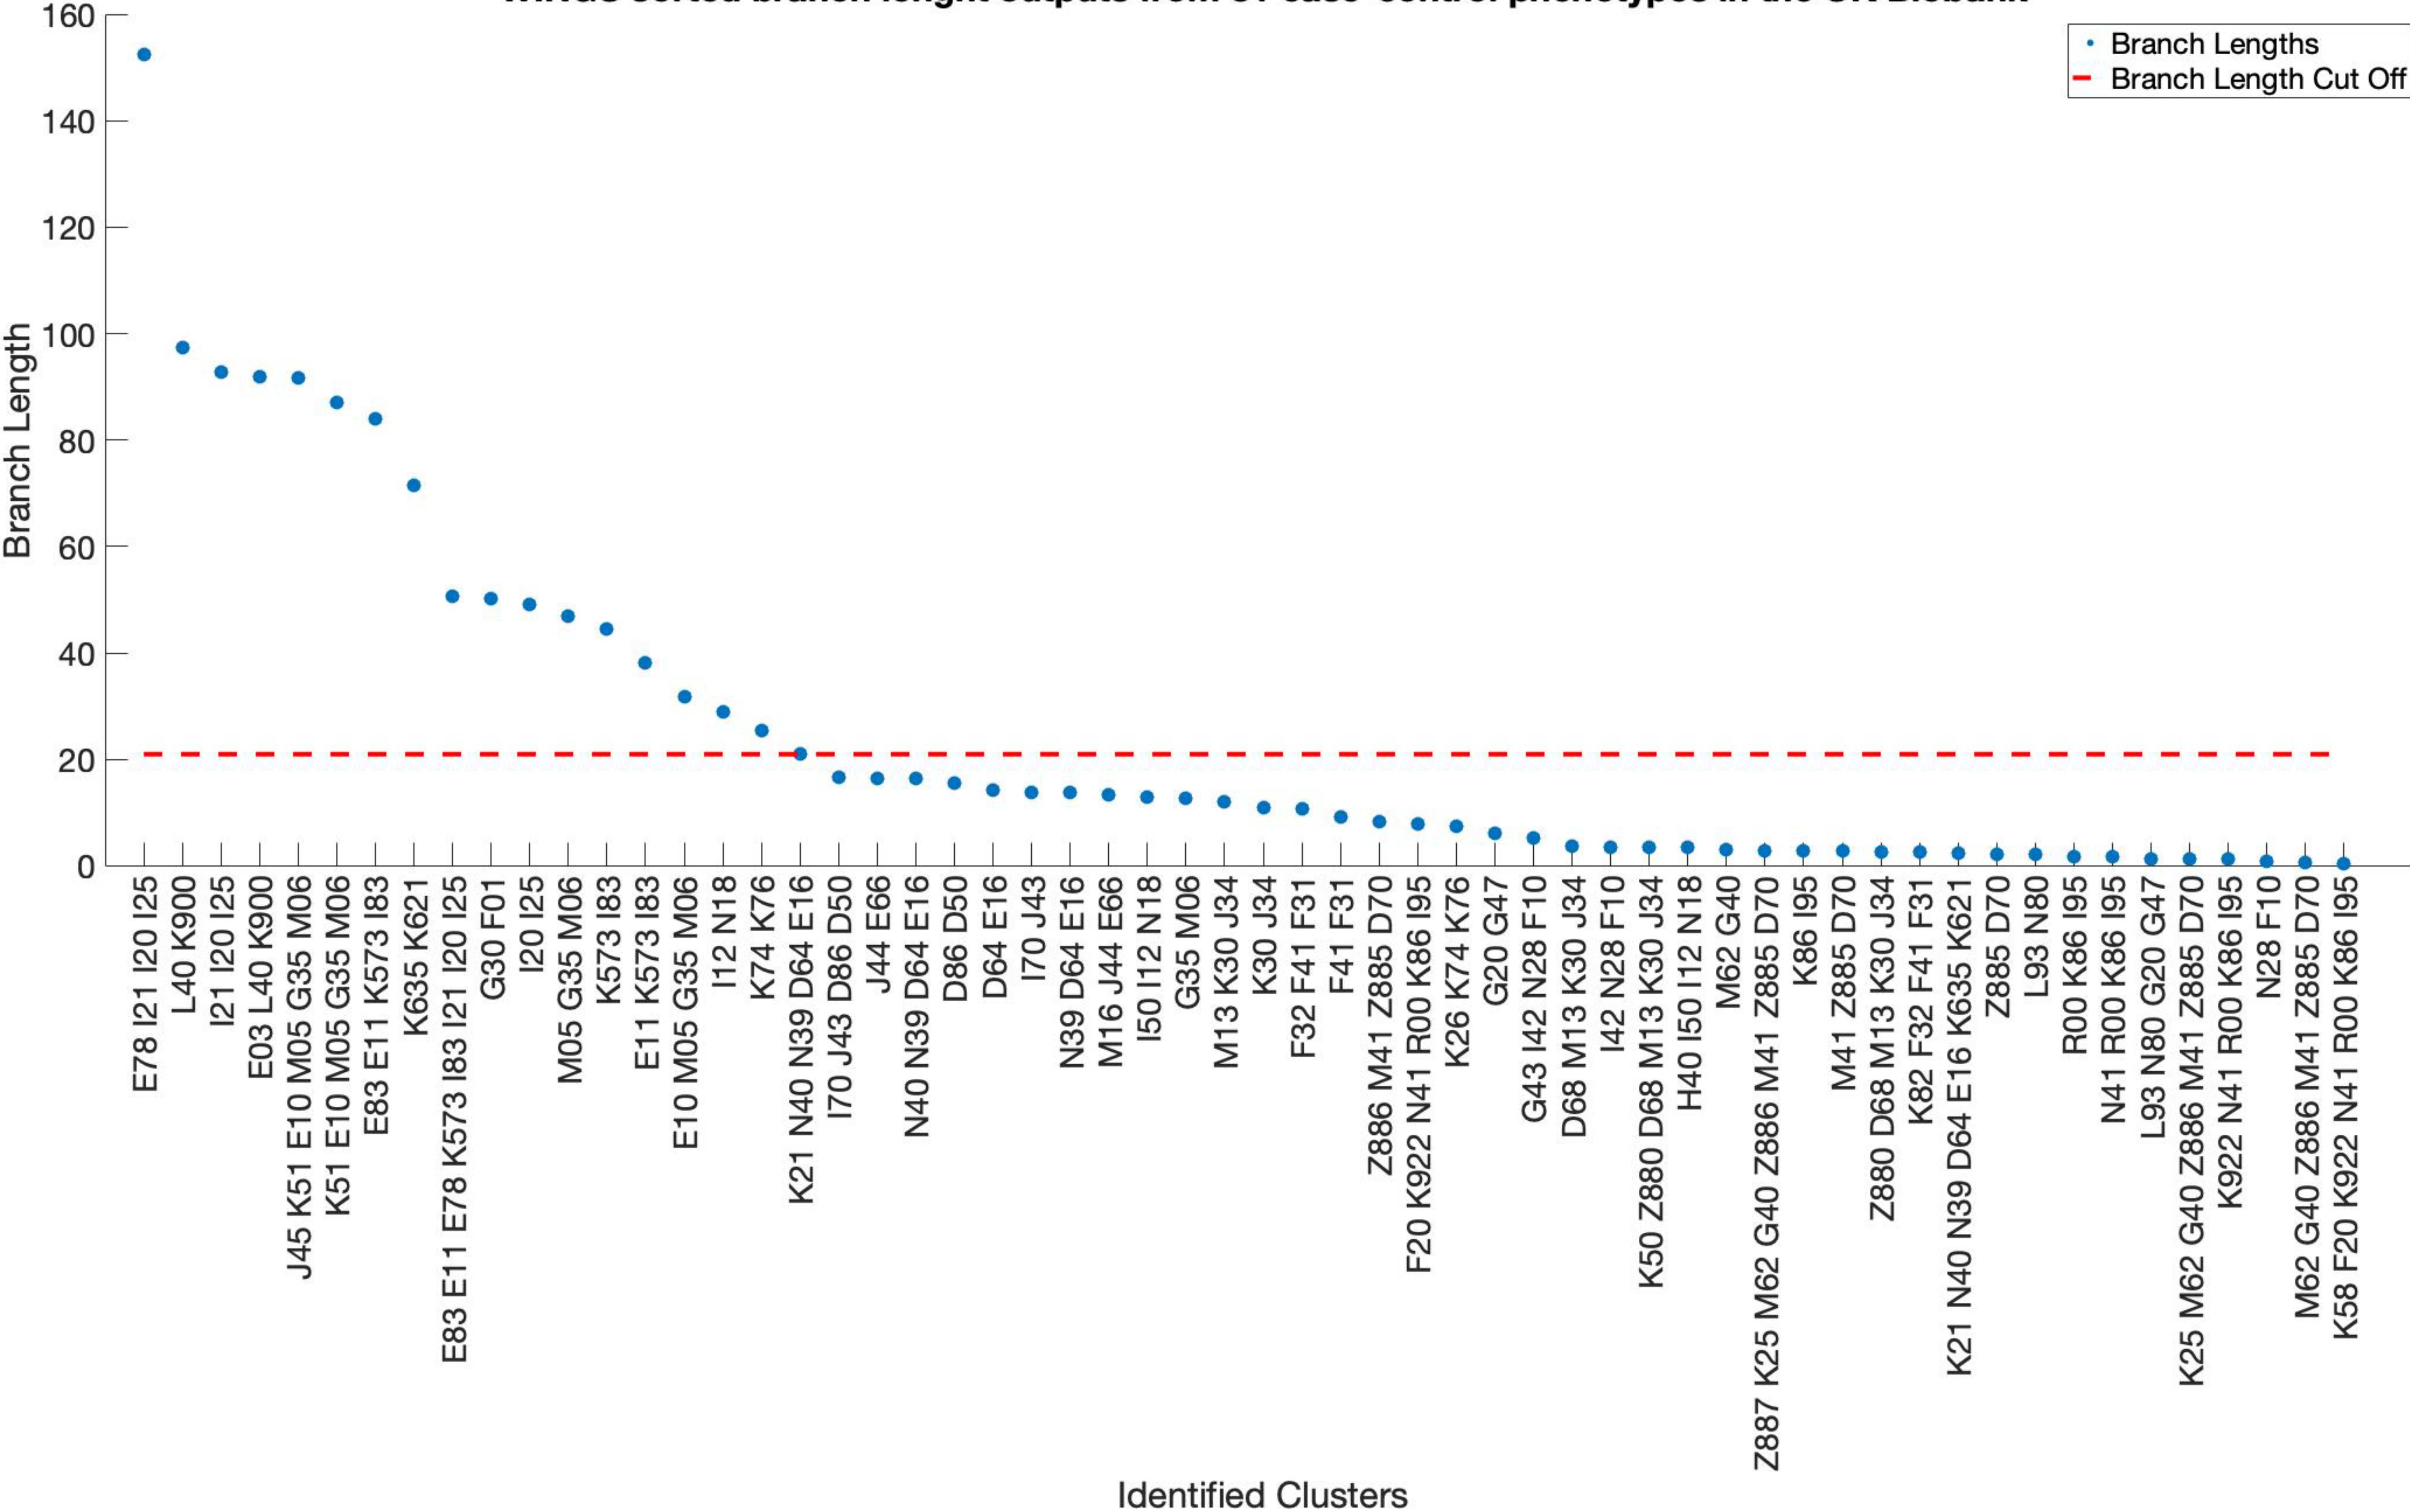

Supplement: Supplementary file 10 [file 1]

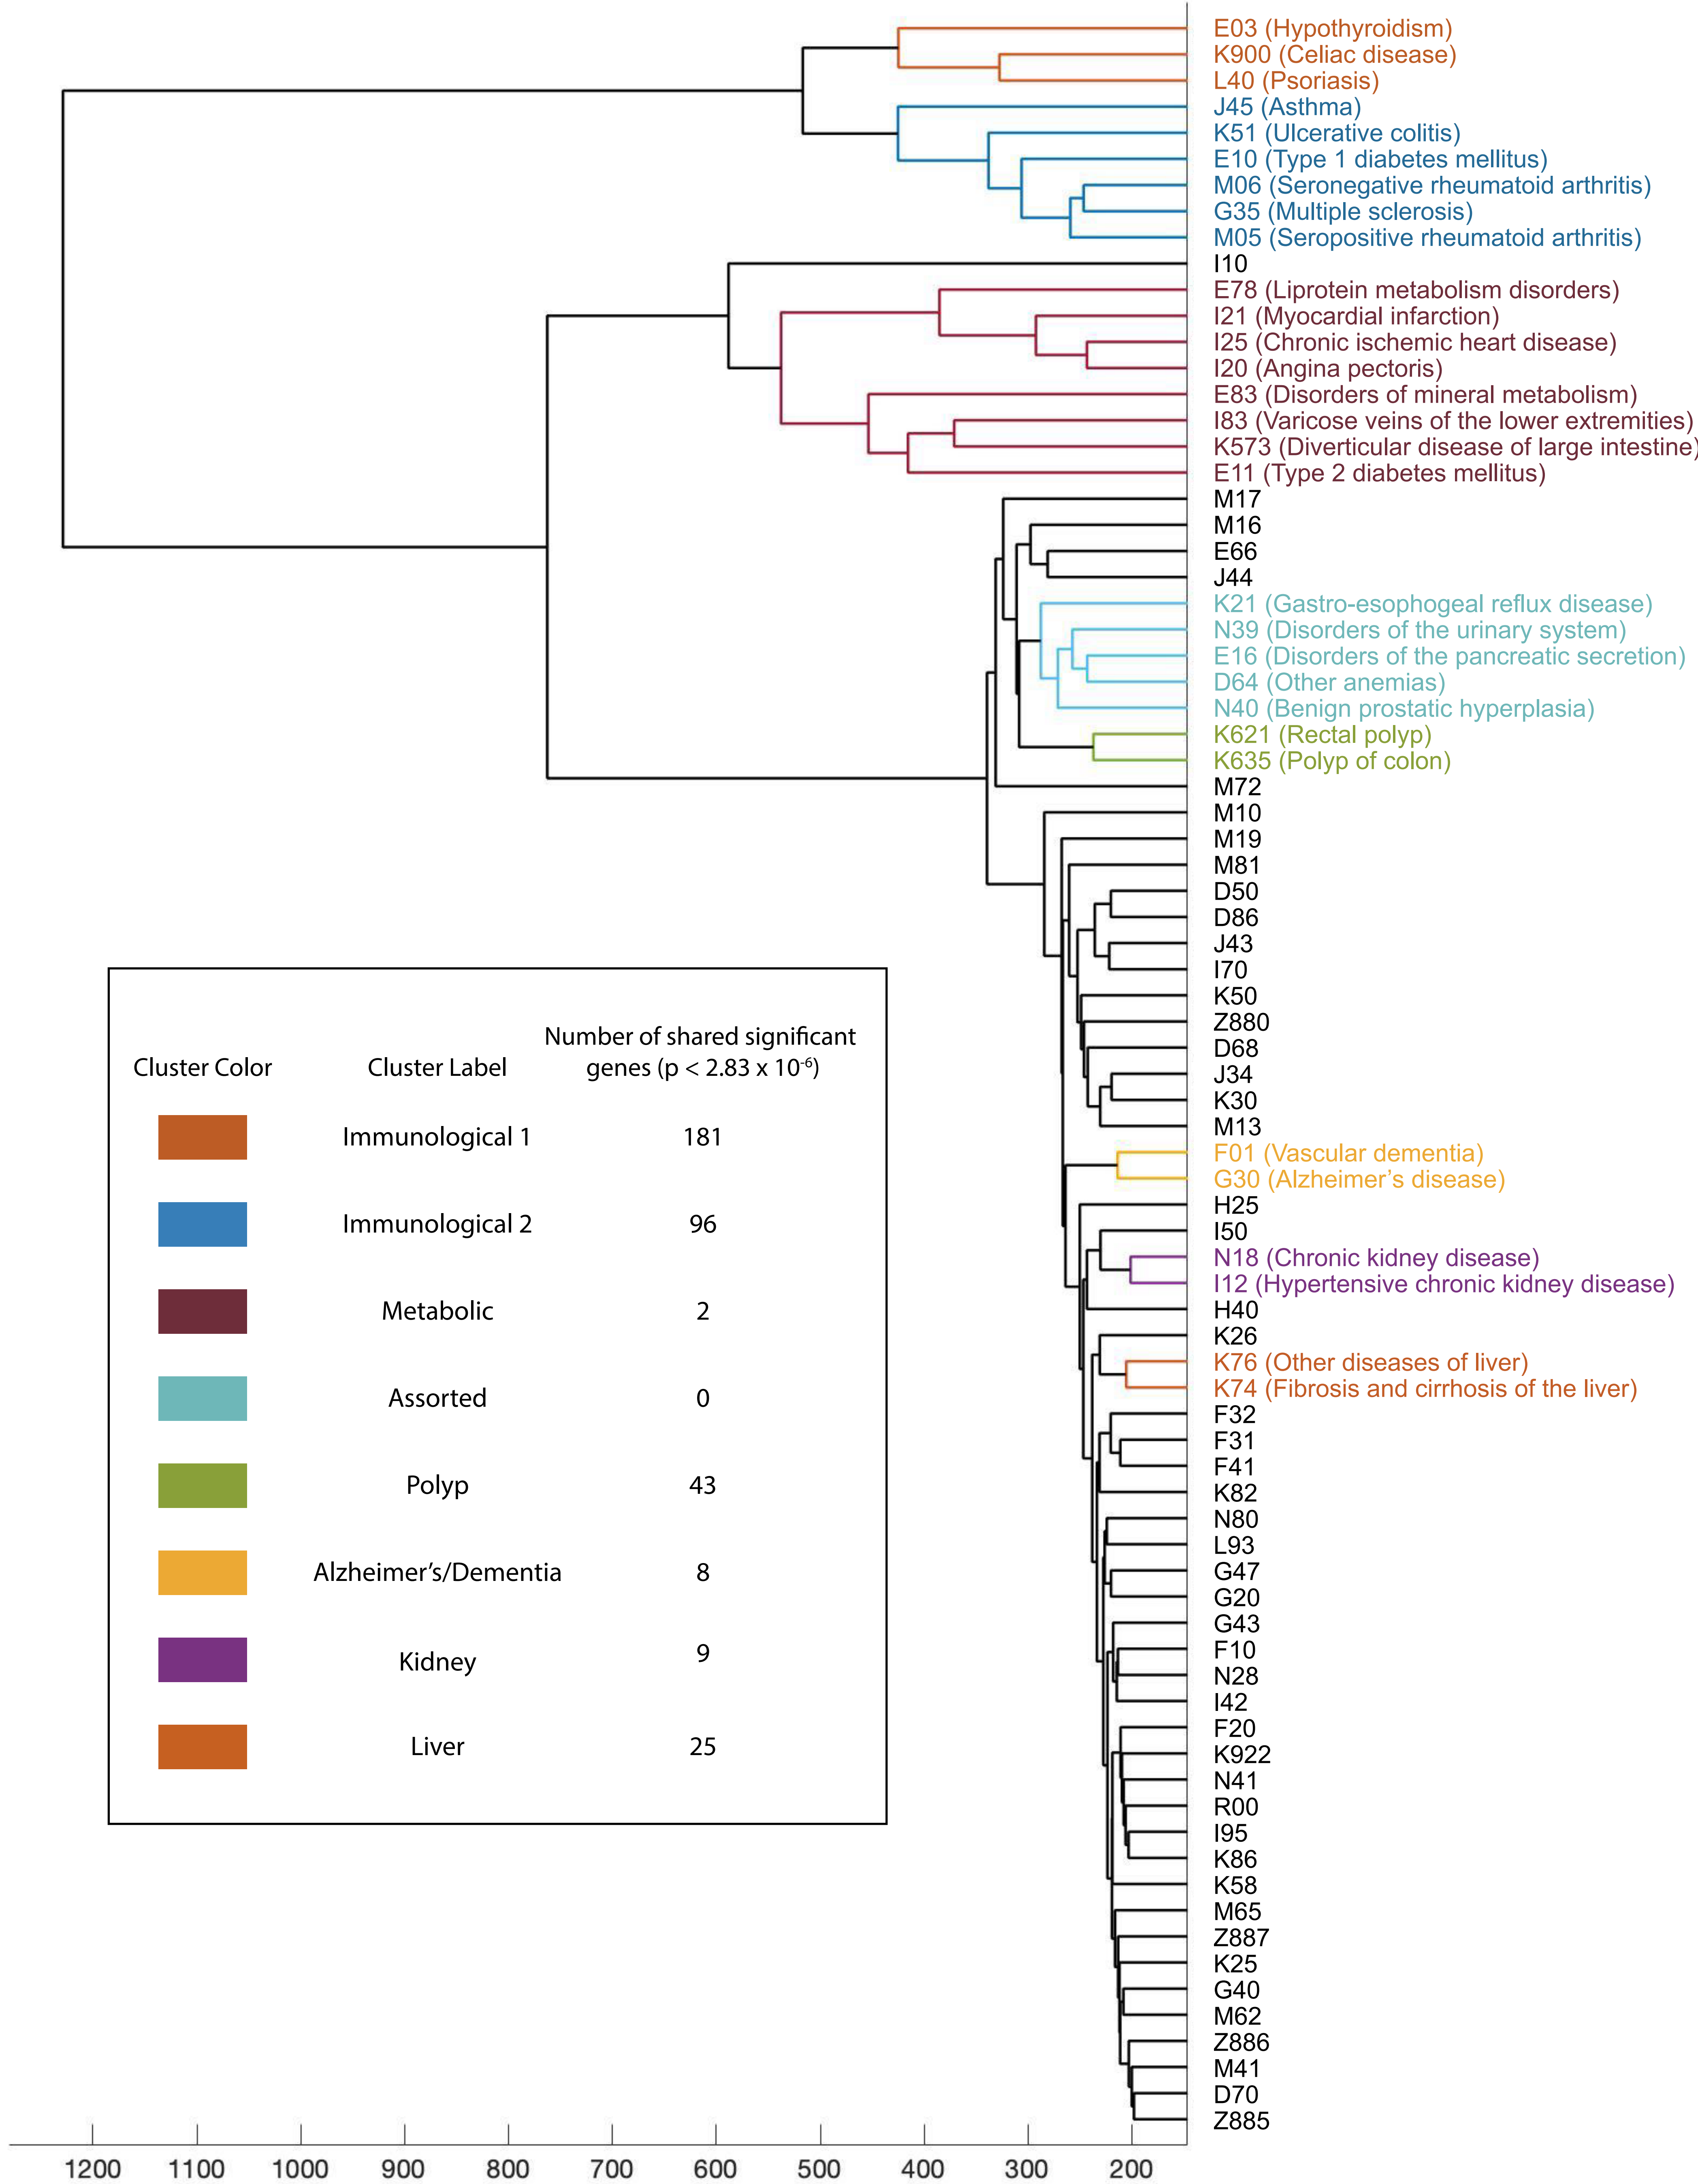

Supplement: Supplementary file 11 [file 1]

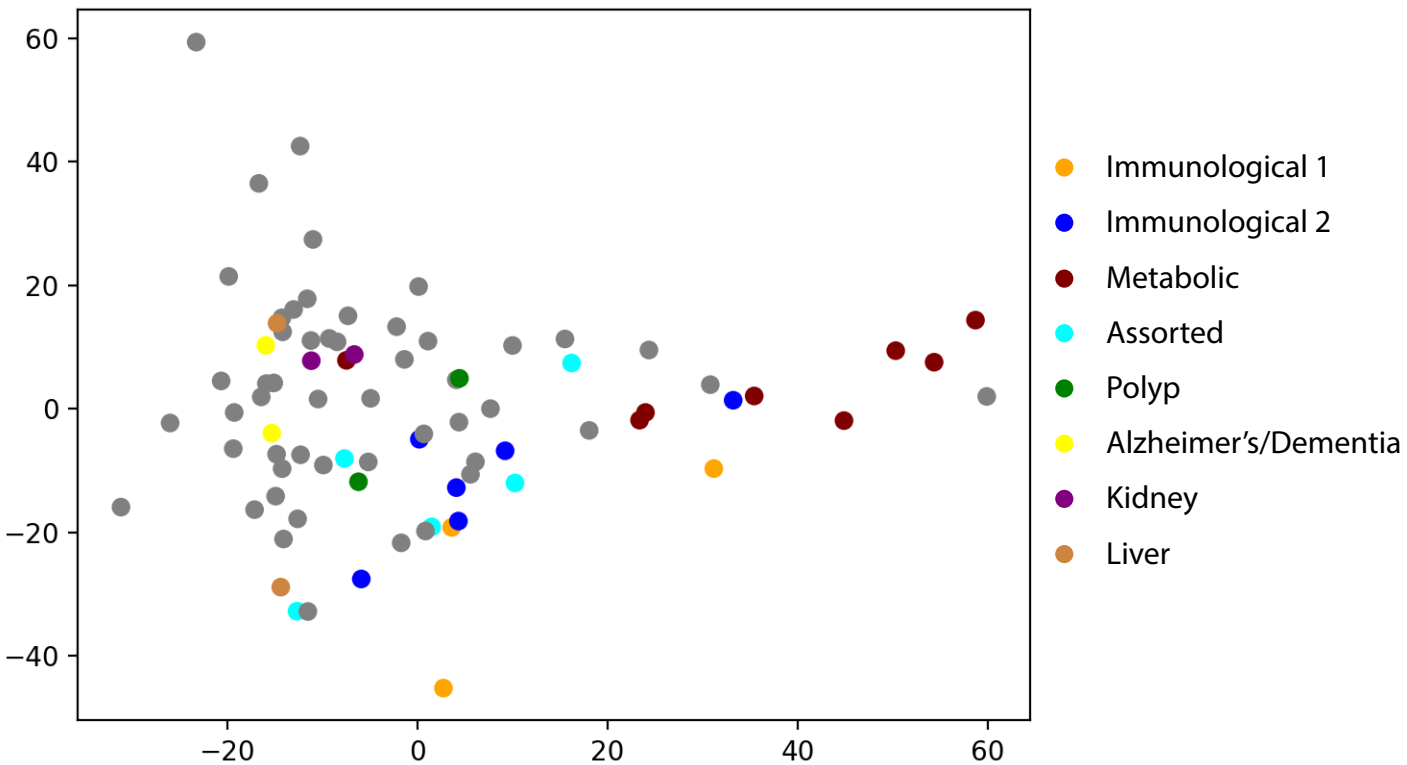

Supplement: Supplementary file 12 [file 1]
